# Supplementary material for: New Insights into Chloramphenicol Biosynthesis in Streptomyces venezuelae ATCC 10712
Source: PubMed Central journal article supplement (PMC4249514; doi:10.1128/aac.04272-14), 2014-12
Supplement: AAC.04272-14_zac012143510so1.pdf [file AAC.04272-14_zac012143510so1.pdf]

# Phyre2

|                                                                                                                                                          |                            |                         |                                    |
|----------------------------------------------------------------------------------------------------------------------------------------------------------|----------------------------|-------------------------|------------------------------------|
| Job Description                                                                                                                                          | sven0925_                  | Date                    | Tue Aug 12 16:31:53 BST 2014       |
| Confidence                                                                                                                                               | 97.96%                     | Aligned Residues        | 77                                 |
| Rank                                                                                                                                                     | 1                          | Template                | c2lkiA_                            |
| % Identity                                                                                                                                               | 19%                        | PDB info                | <b>PDB header:</b> lipid transport |
|                                                                                                                                                          |                            | Chain: A: PDB Molecule: | putative uncharacterized protein;  |
|                                                                                                                                                          |                            | Resolution              | UNK                                |
| Model Dimensions (Å)                                                                                                                                     | X:47.623 Y:30.804 Z:31.761 |                         |                                    |
| PDBTitle: solution nmr structure of holo acyl carrier protein ne2163 from2 nitrosomonas europaea. northeast structural genomics consortium3 target net1. |                            |                         |                                    |

Show / Hide SS confidence

Show / Hide Conservation and Alignment quality

- Insertion relative to template
- Deletion relative to template
- Catalytic residue from the CSA

[Detailed help on interpreting your alignment](#)

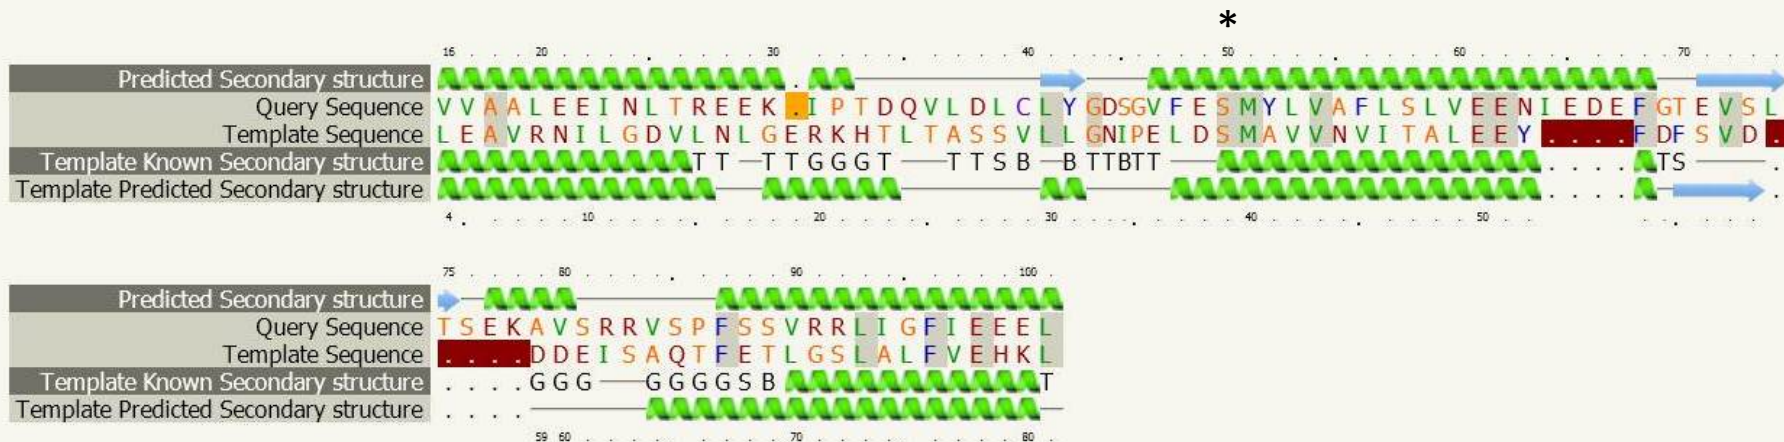

FIG. S1. Phyre<sup>2</sup> alignment of Sven0925 to the holo acyl carrier protein ne2163 from *Nitrosomonas europaea*. 77 residues of Sven0925 (71% of its sequence) were modelled with 98% confidence to the structure of the holo acyl carrier protein (output from Phyre2; <http://www.sbg.bio.ic.ac.uk/phyre2>). \*, conserved serine at position 50 of Sven0925 that is predicted to be the catalytic residue needed for addition of the 4'-phosphopantetheine moiety .

```

Bacillus_cereus      -----MEDTNKEKIIQVVLCCVEEVNENLENKIDLEKGLKAHLYDW 41
Bacillus_bombysepticus -----MEDTNKEKIIQIVLCCVEEVNENLENKIDLEKGLKAHLYDW 41
Bacillus_thuringiensis MICKKECIYLEDTKKKEKIIQIVLCCVEEVNENLENKIDLEKGLKAHLYDW 50
Pelosinus            -----MEQKIIGIILHEVSELNEQLDHKVAIENGENAGLYGL 37
Sven0925             -----MLDGGLKVTERIQGVVVAAL EEINLTREEKIPTDQVLDLCLYGD 44
Desulfovibrio        -----MPLRQQVKQALIEDLN-LQSITPEDI EDDAP-----LFG- 33
                    :::  ::  :.  ::  ..:  :  *:.

#
Bacillus_cereus      EGY-LDSLGLVSLVLSIEQGLEDELGLSVDLVNLDTMSQHNSPFKTI EAL 90
Bacillus_bombysepticus EGY-LDSLGLVSLVLSIEQGLEDELGLSVDLVNLDTMSQHNSPFKTI EAL 90
Bacillus_thuringiensis EGY-LDSLGLVSLVLSIEQGLEDELGLSVDLVNLDTMSQHNSPFKTI ETL 99
Pelosinus            TGV-LDSLGLVTLIVAVEQAIEDELGLAISLADERAMSKNSPFRTIGTL 86
Sven0925             SGV-FESMYLVAFSLVEENIEDEFGTEVSLTSEKAVSRVSPFSSVRRLL 93
Desulfovibrio        DGLGLDSLDAVELVVLVQK----RFGVEIKNMDEGRVA-----FASVTAL 74
                    *  ::*:  *  ::  :::  .*  :.  .  ::  *  ::  *

Bacillus_cereus      VAYILECQEQLKSLT 105
Bacillus_bombysepticus VAYILECQEQLKSLT 105
Bacillus_thuringiensis VAYIIECQETLKSLLT 114
Pelosinus            ADYIVKVSQEEA--- 98
Sven0925             IGFIEEELVGVGRG 108
Desulfovibrio        AGFIEERR----- 82
                    :*  :

```

Percent amino acid sequence identity

|                        |          |
|------------------------|----------|
|                        | Sven0925 |
| Desulfovibrio          | 34.15    |
| Pelosinus fermentans   | 30.61    |
| Bacillus thuringiensis | 29.63    |
| Bacillus cereus        | 31.43    |
| Bacillus bombysepticus | 30.48    |

FIG. S2. Clustal Omega alignment of Sven0925 to homologous proteins identified in a blastP search of the NCBI database as acyl carrier proteins. #, conserved serine at position 50 of Sven0925 that is predicted to be the site of addition of the 4'-phosphopantetheine moiety. Percentage amino acid sequence identities to Sven0925 are given below the alignment.

*Streptomyces venezuelae*

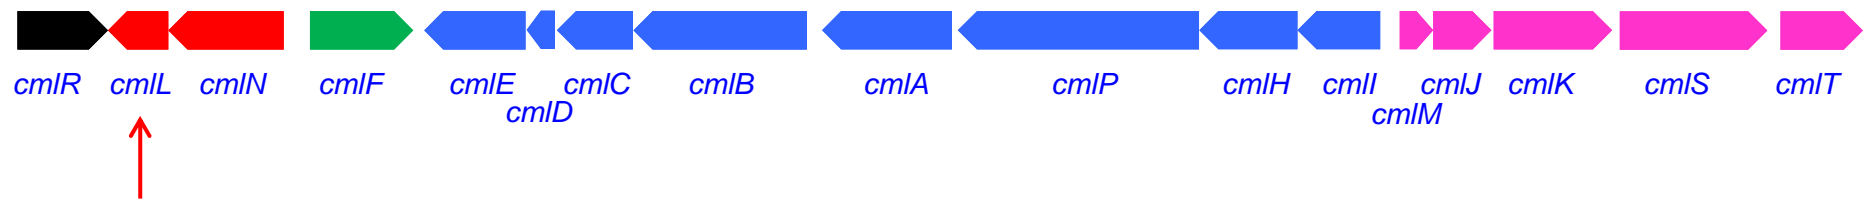

*Micromonospora* sp. ATCC 39149

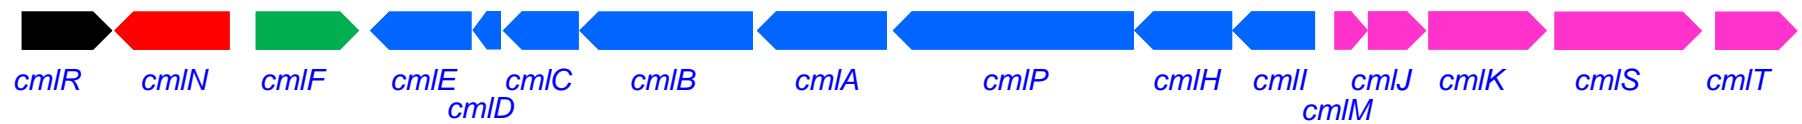

FIG. S3. Comparison of the CHL biosynthetic gene clusters of *S. venezuelae* and *Micromonospora* sp. ATCC 39149. Note the absence of a *cmlL* homologue in the *Micromonospora* gene cluster. The different colours represent potential transcription units.

**Table S1.** Oligonucleotides used in this study.

| Name             | Sequence                                                         | Notes                                                                    |
|------------------|------------------------------------------------------------------|--------------------------------------------------------------------------|
| HygF0909_PCR_T1  | TCAGTCGCCTCGGGCCGTGGCTGCCGCGTGG<br>GCGGTCGGCTGACGCCGTTGGATACACC  | HYG <sup>R</sup> cassette for PCR-Targeting<br><i>sven0909- sven0912</i> |
| HygR0912_PCR_T1  | TGCACGACGGCTGGCTCCGGAGCCGTACGGG<br>GCACGGCGTCAGGCGCCGGGGGCGGTGT  | HYG <sup>R</sup> cassette for PCR-Targeting<br><i>sven0909- sven0913</i> |
| HygF0913_PCR_T2  | ATGTCCACGATTTCCGGATCTACGACAGGCGTC<br>GACCTTCCTGACGCCGTTGGATACACC | HYG <sup>R</sup> cassette for PCR-Targeting<br><i>sven0913- sven0915</i> |
| HygR0915_PCR_T2  | ATGACGACCCACCAGACAGCCATGATCATGAT<br>GGGGCTCTCAGGCGCCGGGGGCGGTGT  | HYG <sup>R</sup> cassette for PCR-Targeting<br><i>sven0913- sven0915</i> |
| Hyg0913_F_KO     | CTTTCCTGTCATCGATGACGTGCGTTCCTGGAG<br>GCATTGCTGACGCCGTTGGATACACC  | HYG <sup>R</sup> cassette for PCR-Targeting<br><i>sven0913</i>           |
| Hyg0913_R_KO     | GAGCGGGCGCCGCCGCTACGGCGGGGCGGC<br>GGTAGGGGATCAGGCGCCGGGGGCGGTGT  | HYG <sup>R</sup> cassette for PCR-Targeting<br><i>sven0913</i>           |
| Hyg0914_F_KO     | GAAGCGAGCGGCGGCCGACGCGGGCCCGG<br>CCTGATCCCTGACGCCGTTGGATACACC    | HYG <sup>R</sup> cassette for PCR-Targeting<br><i>sven0914</i>           |
| Hyg0914_R_KO     | CGCCCGCGCCGGCGGGGAAGCCGTCCGGG<br>GGCGAAGCGTCAGGCGCCGGGGGCGGTGT   | HYG <sup>R</sup> cassette for PCR-Targeting<br><i>sven0914</i>           |
| Hyg0915_F_KO     | GCGCCGCTTCCGGTACGAGCCCGGTCAGGAG<br>CGTCGGCGCTGACGCCGTTGGATACACC  | HYG <sup>R</sup> cassette for PCR-Targeting<br><i>sven0915</i>           |
| Hyg0915_R_KO     | TAACGACTTGGACACCCCGGCGCGGAGAAGG<br>AGTGTTCCTCAGGCGCCGGGGGCGGTGT  | HYG <sup>R</sup> cassette for PCR-Targeting<br><i>sven0915</i>           |
| Compl13_SpeI_F   | CCGTA TAGTCTGACCCGGCGCCGCCTTCC                                   | Complementation of <i>sven0913</i>                                       |
| Compl13_BamHI_R  | CGGTGGATCCTCAGGCCGGGCCCGCTCCG                                    | Complementation of <i>sven0913</i>                                       |
| Compl14_NdeI_F   | GGGCGAACATATGACGCCGACGCTCCTGAC                                   | Complementation of <i>sven0913</i>                                       |
| Compl14_SacII_R  | CCTCCGCGGCTACCGCCGCCCGCCGTAG                                     | Complementation of <i>sven0913</i>                                       |
| Compl15_SpeI_F   | CGAAACTAGTGAAAAAGCTCCA ACTACATC                                  | Complementation of <i>sven0913</i>                                       |
| Compl15_BamHI_R  | AGCGGGATCCTCACCGCTTCGCCCCGACG                                    | Complementation of <i>sven0913</i>                                       |
| F0913_OE_NdeI    | AAATATACATATGTCCACGATTTCCGGATC                                   | Overexpression of <i>sven0913</i>                                        |
| R0913_OE_HindIII | AAAAGCTTTCAGGCCGGGCCCGGTCC                                       | Overexpression of <i>sven0913</i>                                        |
| Cm_0912_RT_F     | CACCGTCTCGGTGTCA                                                 | RT-PCR <i>sven0912</i>                                                   |
| Cm_0912_RT_R     | TCGCCATCCCTCGAAAG                                                | RT-PCR <i>sven0912</i>                                                   |
| Cm_0913_RT_F     | GTCATCGACGGCATGCAC                                               | RT-PCR <i>sven0913</i>                                                   |
| Cm_0913_RT_R     | GTACGTAATATCCGCAGCGC                                             | RT-PCR <i>sven0913</i>                                                   |
| Cm_0915_RT_F     | ATGACGACCCACCAGACAG                                              | RT-PCR <i>sven0915</i>                                                   |
| Cm_0915_RT_R     | CCGACGAGGAACATGAACAG                                             | RT-PCR <i>sven0915</i>                                                   |
| Cm_0916_RT_F     | GTCGGAATTCATGCTGTCCG                                             | RT-PCR <i>sven0916</i>                                                   |
| Cm_0916_RT_R     | GAGGAGGAACGTGATGAGGA                                             | RT-PCR <i>sven0916</i>                                                   |
| Cm_0920_RT_F     | GTACGAGATCTGCCTGACCA                                             | RT-PCR <i>sven0920</i>                                                   |
| Cm_0920_RT_R     | CTTGATGGGCTTGGACTCGA                                             | RT-PCR <i>sven0920</i>                                                   |
| Cm_0924_RT_F     | TCTCCATCAACGCCTACCTC                                             | RT-PCR <i>sven0924</i>                                                   |
| Cm_0924_RT_R     | GACCTGCTTCATCATCTCGC                                             | RT-PCR <i>sven0924</i>                                                   |
| Cm_0927_RT_F     | CTGCGAAGGTTGAGGACT                                               | RT-PCR <i>sven0927</i>                                                   |
| Cm_0927_RT_R     | CACCGAGTCCAGCGAGTAGT                                             | RT-PCR <i>sven0927</i>                                                   |
| Cm_0929_RT_F     | GACCACATCGACCTCTGCTA                                             | RT-PCR <i>sven0929</i>                                                   |
| Cm_0929_RT_R     | AGGGAGTACTCGGACTGGAC                                             | RT-PCR <i>sven0929</i>                                                   |
| Cm_0930_RT_F     | GCATCACCGAGGAACAGC                                               | RT-PCR <i>sven0930</i>                                                   |
| Cm_0930_RT_R     | CCAGTCGAAGTACTCCACCA                                             | RT-PCR <i>sven0930</i>                                                   |
